# Supplementary material
Source: publisher figshare collection journal article supplement (https://asha.figshare.com/articles/dataset/_/22782986)
Supplement: Supplementary file 2 [file 1]

**Supplemental Material S1.** Communicative Participation Item Bank (CPIB; Baylor et al., 2013) questions used in the questionnaire, listed in the order presented.

1. How difficult is it for you to talk with people you know?
2. How difficult is it for you to have a conversation that needs to be quick?
3. How difficult is it for you to talk with people you do NOT know?
4. How difficult is it for you to communicate in a small group of people?
5. How difficult is it for you to have a long conversation with someone you know about a book, movie, show, or sports event?
6. How difficult is it for you to get your turn in a fast-moving conversation?
7. How difficult is it for you to have a conversation when you are upset?
8. How difficult would it be for you to communicate during an emergency?
9. How difficult is it for you to have a short phone conversation with someone who knows you well?
10. How difficult is it for you to communicate over video calls?

## Reference

Baylor, C., Yorkston, K., Eadie, T., Kim, J., Chung, H., & Amtmann, D. (2013). The Communicative Participation Item Bank (CPIB): Item bank calibration and development of a disorder-generic short form. *Journal of Speech, Language, and Hearing Research*, 56(4), 1190–1208. [https://doi.org/10.1044/1092-4388\(2012/12-0140\)](https://doi.org/10.1044/1092-4388(2012/12-0140))
