# Supplementary material
Source: publisher figshare collection journal article supplement (https://asha.figshare.com/articles/dataset/_/22782986)
Supplement: Supplementary file 3 [file 1]

**Supplemental Material S5.** Descriptive statistics for total eight-item Communicative Participation Item Bank (CPIB; Baylor et al., 2013) score for Group 1 and for each condition for Group 2, score increases for Group 2 when using communication aids, and effect sizes for those differences, by Revised amyotrophic lateral sclerosis Functional Rating Scale (Bakker et al., 2020; Cedarbaum et al., 1999) speech rating.

|                                   |                    | ALSFRS-R speech rating   |                                     |                                        |                                            |                         |
|-----------------------------------|--------------------|--------------------------|-------------------------------------|----------------------------------------|--------------------------------------------|-------------------------|
|                                   |                    | 4<br>No speech<br>change | 3<br>Detectable<br>speech<br>change | 2<br>Intelligible<br>with<br>repeating | 1<br>Combining<br>speech and<br>non-speech | 0<br>Unable to<br>speak |
| <b>Group 1</b>                    |                    | <i>n</i> = 57            | <i>n</i> = 25                       | <i>n</i> = 37                          | <i>n</i> = 2                               | <i>n</i> = 0            |
|                                   | Mean ( <i>SE</i> ) | 22.1 (0.46)              | 18.0 (0.87)                         | 11.5 (0.75)                            | 6.0 (3.00)                                 |                         |
|                                   | Max                | 24                       | 24                                  | 23                                     | 9                                          |                         |
|                                   | Q3                 | 24                       | 22                                  | 14                                     | 7.5                                        |                         |
|                                   | Median             | 24                       | 20                                  | 12                                     | 6                                          |                         |
|                                   | Q1                 | 22                       | 15                                  | 8                                      | 4.5                                        |                         |
|                                   | Min                | 5                        | 9                                   | 3                                      | 3                                          |                         |
| <b>Group 2</b>                    |                    | <i>n</i> = 3             | <i>n</i> = 6                        | <i>n</i> = 17                          | <i>n</i> = 26                              | <i>n</i> = 33           |
| <b>All methods</b>                | Mean ( <i>SE</i> ) | 20.7 (1.67)              | 13.7 (3.06)                         | 10.4 (1.10)                            | 6.3 (0.93)                                 | 10.5 (0.94)             |
|                                   | Max                | 24                       | 24                                  | 16                                     | 17                                         | 21                      |
|                                   | Q3                 | 21.5                     | 19.5                                | 14                                     | 10                                         | 15                      |
|                                   | Median             | 19                       | 10.5                                | 10                                     | 5                                          | 10                      |
|                                   | Q1                 | 19                       | 9                                   | 8                                      | 2.25                                       | 7                       |
|                                   | Min                | 19                       | 6                                   | 2                                      | 0                                          | 0                       |
| <b>Unaided only</b>               | Mean ( <i>SE</i> ) | 19.0 (1.00)              | 11.8 (2.43)                         | 8.9 (1.21)                             | 2.5 (0.59)                                 | 2.5 (1.03)              |
|                                   | Max                | 21                       | 21                                  | 16                                     | 13                                         | 24                      |
|                                   | Q3                 | 19.5                     | 15.5                                | 12                                     | 3                                          | 2                       |
|                                   | Median             | 18                       | 10                                  | 9                                      | 2                                          | 0                       |
|                                   | Q1                 | 18                       | 7.5                                 | 5                                      | 1                                          | 0                       |
|                                   | Min                | 18                       | 6                                   | 1                                      | 0                                          | 0                       |
| <b>Difference</b>                 | Mean ( <i>SE</i> ) | 1.7 (0.67)               | 1.8 (0.79)                          | 1.5 (0.80)                             | 3.8 (0.83)                                 | 8.0 (1.20)              |
|                                   | Max                | 3                        | 5                                   | 11                                     | 14                                         | 19                      |
|                                   | Q3                 | 2                        | 2.75                                | 2                                      | 6.75                                       | 13                      |
|                                   | Median             | 1                        | 1.5                                 | 0                                      | 3                                          | 8                       |
|                                   | Q1                 | 1                        | 0.25                                | 0                                      | 0.25                                       | 4                       |
|                                   | Min                | 1                        | 0                                   | -2                                     | -3                                         | -13                     |
| <b>Effect size for difference</b> |                    | $\Delta$                 | 0.96*                               | 0.31*                                  | 0.31                                       | 1.25                    |
|                                   |                    |                          |                                     |                                        | 1.25                                       | 1.36                    |

\* Effect sizes for Group 2 participants with speech ratings 4 and 3 should be interpreted with extreme caution due to the small sample sizes for those subgroups and the strong possibility of sampling bias.

## References

- Bakker, L. A., Schröder, C. D., Tan, H. H. G., Vugts, S. M. A. G., van Eijk, R. P. A., van Es, M. A., Visser-Meily, J. M. A., & van den Berg, L. H. (2020). Development and assessment of the inter-rater and intra-rater reproducibility of a self-administration version of the ALSFRS-R. *Journal of Neurology, Neurosurgery, & Psychiatry*, 91(1), 75–81. <https://doi.org/10.1136/jnnp-2019-321138>
- Baylor, C., Yorkston, K., Eadie, T., Kim, J., Chung, H., & Amtmann, D. (2013). The Communicative Participation Item Bank (CPIB): Item bank calibration and development of a disorder-generic short form. *Journal of Speech, Language, and Hearing Research*, 56(4), 1190–1208. [https://doi.org/10.1044/1092-4388\(2012/12-0140\)](https://doi.org/10.1044/1092-4388(2012/12-0140))
- Cedarbaum, J. M., Stambler, N., Malta, E., Fuller, C., Hilt, D., Thurmond, B., Nakanishi, A., & BDNF ALS Study Group (Phase III). (1999). The ALSFRS-R: A revised ALS functional rating scale that incorporates assessments of respiratory function. *Journal of the Neurological Sciences*, 169(1–2), 13–21. [https://doi.org/10.1016/S0022-510X\(99\)00210-5](https://doi.org/10.1016/S0022-510X(99)00210-5)
